# Supplementary material
Source: PubMed Central journal article supplement (PMC3055380)
Supplement: npp2009142x6.pdf [file npp2009142x6.pdf]

**Supplemental Table 1: Statistical results for Pavlovian conditional approach (food US)**

| Dependent variable                                 | Statistical Effects          |                             |                             |
|----------------------------------------------------|------------------------------|-----------------------------|-----------------------------|
|                                                    | Phenotype                    | Session                     | Phenotype x Session         |
| Probability to approach the lever-CS (both groups) | $F_{(1,84)}=113.3, P<0.0001$ | $F_{(6,83)}=10.6, P<0.0001$ | $F_{(6,83)}=4.3, P=0.001$   |
| Contact with the lever-CS (both groups)            | $F_{(1,83)}=99.6, P<0.0001$  | $F_{(6,84)}=9.3, P<0.0001$  | $F_{(6,84)}=5.8, P<0.0001$  |
| Latency to contact the lever-CS (both groups)      | $F_{(1,84)}=118.6, P<0.0001$ | $F_{(6,83)}=13.1, P<0.0001$ | $F_{(6,83)}=7.2, P<0.0001$  |
| Probability to approach the food cup (both groups) | $F_{(1,84)}=14.3, P<0.0001$  | $F_{(6,83)}=2.6, P=0.02$    | $F_{(6,83)}=12.5, P<0.0001$ |
| Contact with the food cup (both groups)            | $F_{(1,83)}=18.7, P<0.0001$  | $F_{(6,83)}=2.6, P=0.02$    | $F_{(6,83)}=7.5, P<0.0001$  |
| Latency to contact the food cup (both groups)      | $F_{(1,84)}=16.4, P<0.0001$  | $F_{(6,82)}=2.9, P=0.01$    | $F_{(6,82)}=10.3, P<0.0001$ |
| Probability to approach the lever-CS (for bHRs)    |                              | $F_{(6,41)}=10.5, P<0.0001$ |                             |
| Contact with the lever-CS (for bHRs)               |                              | $F_{(6,42)}=8.3, P<0.0001$  |                             |
| Latency to contact the lever-CS (for bHRs)         |                              | $F_{(6,42)}=12.9, P<0.0001$ |                             |
| Probability to approach the food cup (for bLRs)    |                              | $F_{(6,42)}=14.6, P<0.0001$ |                             |
| Contact with the food cup (for bLRs)               |                              | $F_{(6,42)}=7.1, P<0.0001$  |                             |
| Latency to contact the food cup (for bLRs)         |                              | $F_{(6,41)}=10.1, P<0.0001$ |                             |

This table represents the statistical results for Pavlovian conditional approach behavior when food served as the US. The effects of phenotype, session, and the interaction between these two variables are shown in the table. The behavior of bHRs and bLRs was also analyzed separately and the effect of session is shown for measures of sign-tracking (bHRs) and goal-tracking (bLRs) behavior for each phenotype.
