# Supplementary material
Source: PubMed Central journal article supplement (PMC3055380)
Supplement: npp2009142x7.pdf [file npp2009142x7.pdf]

**Supplemental Table 2: Statistical results for Pavlovian conditional approach (cocaine US)**

| Dependent variable                                 | Statistical Effects        |                            |                          |
|----------------------------------------------------|----------------------------|----------------------------|--------------------------|
|                                                    | Phenotype                  | Trial block                | Phenotype x Trial block  |
| Probability to approach the lever-CS (both groups) | $F_{(1,17)}=11.5, P=0.004$ | $F_{(5,67)}=67.3, P=0.001$ | $F_{(5,67)}=3.3, P=0.01$ |
| Number of approaches to the lever-CS (both groups) | $F_{(1,16)}=7.3, P=0.02$   | $F_{(5,68)}=5.0, P=0.001$  | $F_{(5,68)}=3.1, P=0.02$ |
| Latency to approach the lever-CS (both groups)     | $F_{(1,17)}=10.1, P=0.005$ | $F_{(5,67)}=5.0, P=0.001$  | $F_{(5,67)}=2.7, P=0.03$ |
| Probability to approach the lever-CS (for bHRs)    |                            | $F_{(5,24)}=4.9, P=0.003$  |                          |
| Number of approaches to the lever-CS (for bHRs)    |                            | $F_{(5,17)}=5.0, P=0.006$  |                          |
| Latency to approach the lever-CS (for bHRs)        |                            | $F_{(5,17)}=7.4, P=0.001$  |                          |

This table represents the statistical results for Pavlovian conditional approach behavior when cocaine served as the US. The effects of phenotype, trial block, and the interaction between these two variables are shown in the table. The behavior of bHR rats was also analyzed separately and the effect of trial block is shown for this group.
